# Supplementary material for: Nanosized tetragonal β-FeSe phase obtained by mechanical alloying: structural, microstructural, magnetic and electrical characterization
Source: Royal Society of Chemistry journal article supplement (doi:10.1039/c7ra13473h), 2018-01-01
Supplement: c7ra13473h1.pdf [file c7ra13473h1.pdf]

## RSC Advances

### Electronic supplementary information

### Nanosized Tetragonal $\beta$ -FeSe phase obtained by Mechanical Alloying: Structural, Microstructural, Magnetic and Electrical Characterizations

K.F. Ulbrich<sup>a</sup> and C.E.M. Campos<sup>a</sup>

<sup>a</sup> Departamento de Física, Universidade Federal de Santa Catarina, Campus Trindade, 88 040-900 Florianópolis, Santa Catarina - SC, Brazil.

E-mail: carlos.campos@ufsc.br

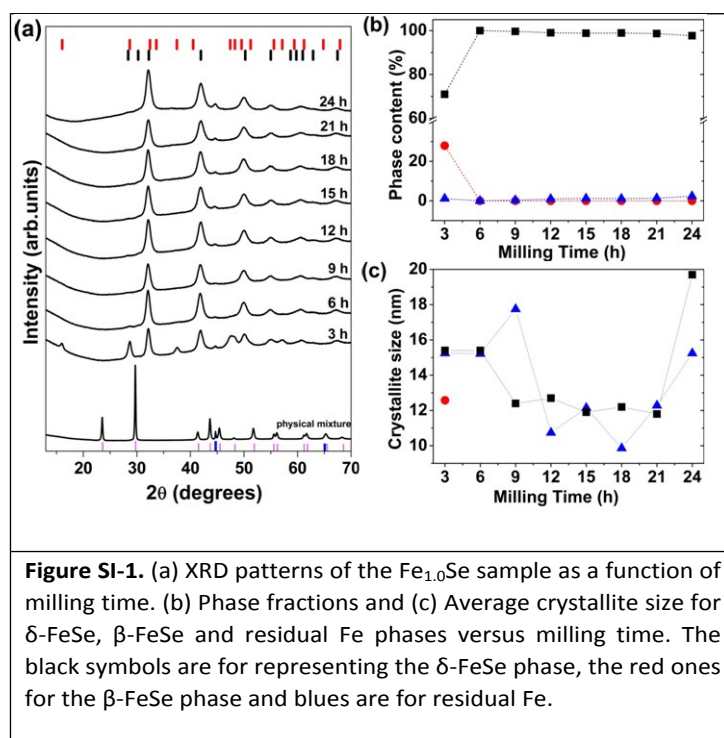

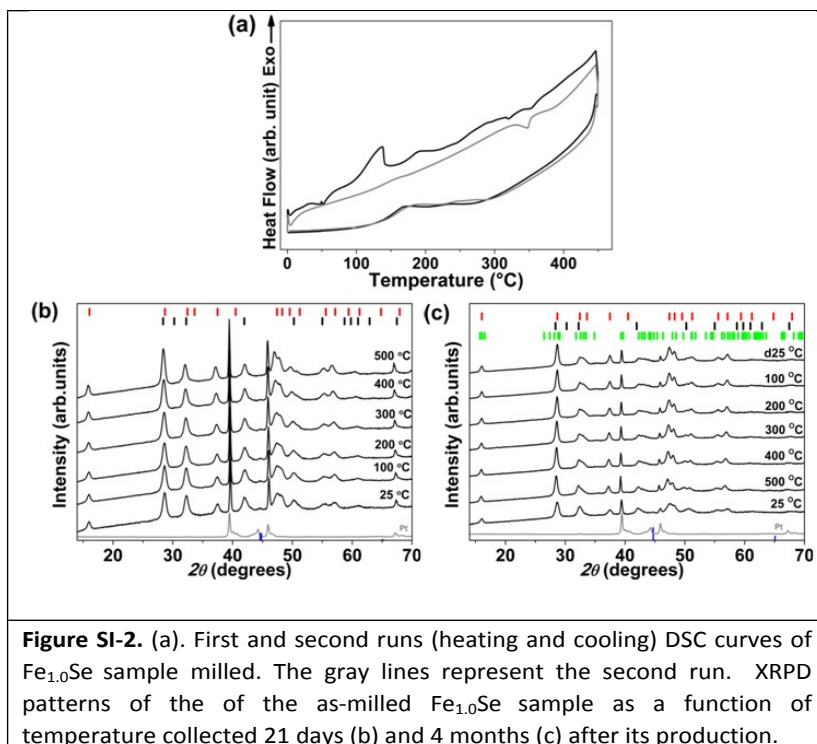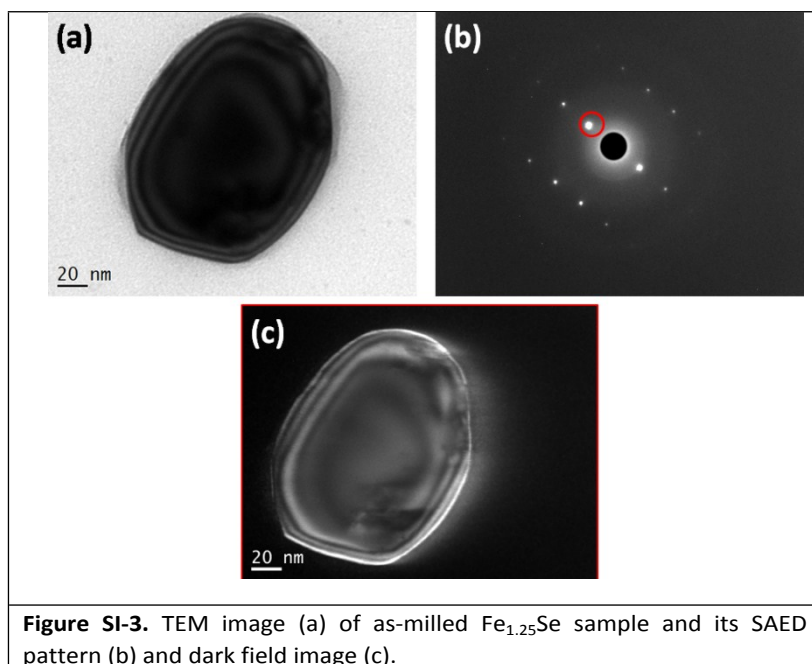

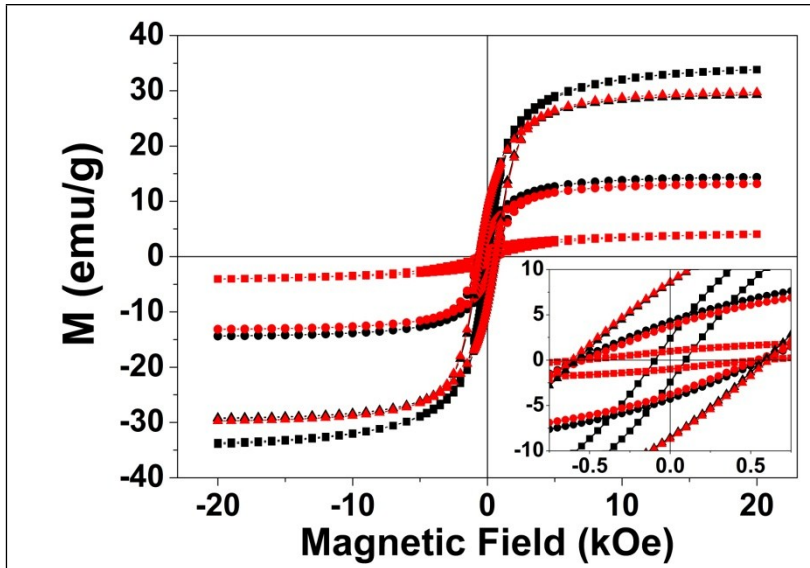

Figure SI-4. Magnetizations curves for  $\text{Fe}_{1.0}\text{Se}$  (squares),  $\text{Fe}_{1.25}\text{Se}$  (circles) and  $\text{Fe}_{1.5}\text{Se}$  (triangles) samples at room temperature. Black and red symbols represent the values for the as-milled and thermal treated

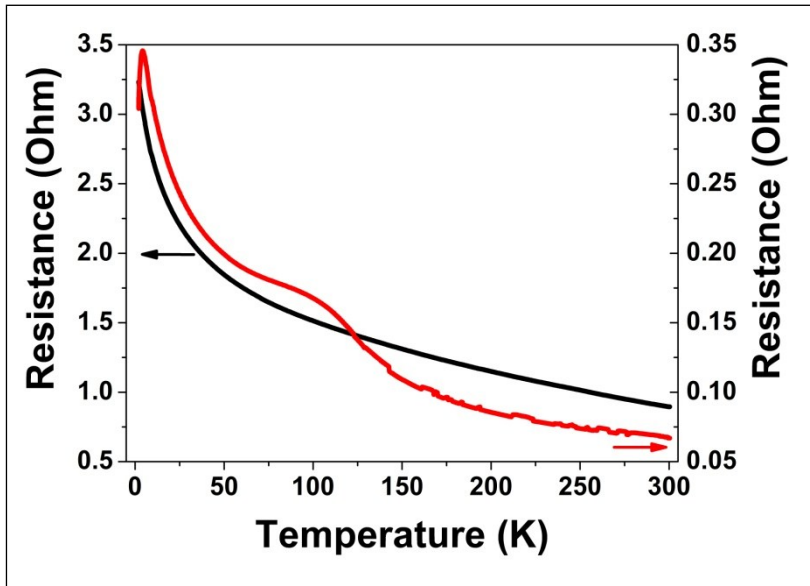

Figure SI-5. Electrical resistance of as-milled (black line) and thermal treated (red line)  $\text{Fe}_{1.25}\text{Se}$  samples as a function of temperature.
